# Supplementary material for: The association of HLA-G polymorphism with oral and genital HPV infection in men
Source: Springer Nature journal article supplement (doi:10.1007/s10096-021-04362-8), 2021-10-25
Supplement: MOESM1 [file 19791586]

**Table S1** Genotype specific HPV positivity at baseline in semen-, urethra- and oral samples among the 128 men of the Finnish Family HPV Study.

| HPV genotype                    | semen<br>n=86 (%) | urethra<br>n=122 (%) | oral<br>n=128 (%) |
|---------------------------------|-------------------|----------------------|-------------------|
| LR-HPV                          |                   |                      |                   |
| HPV6                            | 7 (8.1)           | 7 (5.7)              | 1 (0.8)           |
| HPV11                           | 2 (2.3)           | 1 (0.8)              | 2 (1.6)           |
| HPV43                           | ...               | 1 (0.8)              | 1 (0.8)           |
| total LR-HPV                    | 9 (10.5)          | 9 (7.4)              | 4 (3.1)           |
| HR-HPV                          |                   |                      |                   |
| HPV16                           | 12 (14.0)         | 10 (8.2)             | 12 (9.4)          |
| HPV18                           | 3 (3.5)           | ...                  | 1 (0.8)           |
| HPV31                           | 1 (1.2)           | ...                  | 1 (0.8)           |
| HPV33                           | 4 (4.7)           | 5 (4.1)              | 4 (3.1)           |
| HPV45                           | 1 (1.2)           | ...                  | ...               |
| HPV51                           | ...               | 1 (0.8)              | ...               |
| HPV53                           | 1 (1.2)           | 3 (2.5)              | ...               |
| HPV56                           | ...               | 2 (1.6)              | ...               |
| HPV59                           | 1 (1.2)           | ...                  | ...               |
| HPV66                           | 2 (2.3)           | 1 (0.8)              | ...               |
| HPV70                           | 1 (1.2)           | 3 (2.5)              | 1 (0.8)           |
| HPV82                           | ...               | ...                  | 5 (3.9)           |
| total HR-HPV                    | 23 (26.7)         | 20 (16.4)            | 21 (16.4)         |
| any HPV+                        | 27 (31.4)         | 27 (22.1)            | 24 (18.8)         |
| HPV negative                    | 59 (68.6)         | 95 (77.9)            | 104 (81.3)        |
| multiple infection <sup>1</sup> | 6 (7.0)           | 6 (4.9)              | 4 (3.1)           |

<sup>1</sup>Infection with two of more different HPV genotypes detected defined as multiple infection.
